# Supplementary material for: Changes in RNA polymerase II progression influence somatic hypermutation of Ig-related genes by AID
Source: PubMed Central journal article supplement — J Exp Med. 2013 Jul 1;210(7):1481–92. doi: 10.1084/jem.20121523 (PMC3698518; doi:10.1084/jem.20121523), 2013-07-01
Supplement: supp_jem.20121523_JEM_20121523_sm.pdf [file supp_jem.20121523_JEM_20121523_sm.pdf]

SUPPLEMENTAL MATERIAL

Kodgire et al., <http://www.jem.org/cgi/content/full/jem.20121523/DC1>

```

GGTTGGGATAAGGCTGGATTATCTGAGTCCAAGCTAGGCCCTTTGCTAATCATGTCATACCTCTTAICTCTCTCCCAAGCTCCTGGGCAACGTGCT 100
GGTCTGTGTGCTGGCCCATCCTTTGGCAAAGAATTCACCCACCAGTGCAGGCTGCCTATCAGAAAAGTGGTGGCTGGTGGCTAATGCCCTGGCCAC 200
AAGTATCACTAAGCTCGCTTTCTTGCTGTCCAATTTCTATTAAGGTTCCCTTTGTTCCCTAAGTCCAACCTAACTGGGGATATTTAAGGGCCTT 300
GAGCATCTGGATTCTGCCTAATAAAACATTTATTTTCATTGCAATGATGTATTTAAATTAATTTCTGAATATTTTACTAAAAAGGGAATGGGAGGTC 400
AGTGCATTTAAACATAAAGAATGAAGAGCTAGTTCAAACCTTGGGAAAAACACTATATCTTAACTCCATGAAAGAAGGTGAGGCTGCAACAGCTA 500
ATGCACATTTGGCAACAGCCCTGATGCATATGCCTTATTCATCCCTCAGAAAAGGATTTAGCATAGTGTTACCATCAACCACCTTAACCTCATTTCCTT 600
ATTCAATACCTAGGTAGGTAGATGCATAGATTCGGAAATAAATATAGTCTCAAGTGGTCCCTTGTCTCTCTCCAGTCAAATTTCTGAATCTAGTTGGC 700
AAGATTCTGAAATCAAGGCATATAATCAGTAATAAGTGAATGATAGAAGGTTATAGAGAATTTTATTTATATGAGAGGTTGAAACCCTCAAATGAAAT 800
GAAATCAGACCCTTGTCTTACACCATAAACAAAATAAATTTGAATGGTTAAAGAATTAACCTAAGACCTAAACCCATAAAAAATTTTAAAGAAATCAA 900
AAGAAGAAAATTTCTAATATTCACGTTGCAGCCGTTTTTTGAATTTGATATGAGAAGCAAAGGCARCAAAAAGGAAAAATAAGAAGTGAGGCTACATCAA 1000
CTAAAAAATTTCCACAAAAAACAACAATGAACAAATGAAAGGTGAACCATGAAATGGCATATTTGCAAAACCAATATTTCTTAAATATTTTGGTTA 1100
ATATCCAAAATATAAAGAAACACAGATGATTCATAACAAACAAAAATTAATAATAGGAAAATAAAAAATTAATAAGAGAAAAATCCTGCCATTTAT 1200
GGCAGAAATTTGATGAACCTGGAGGATGTAATAACTAAGAAAAATAAGCCTGACACAAAAAGACAAATACACACACCTTGCTCATATGTGAAACATAAAAA 1300
AGTCACCTCATGGAAACAGACAGTAGAGGTATGGTTCCAGGGTTGGGGTGGGAGAATCA 1363
    
```

**Figure S1. Human  $\beta$ -globin transcription terminator sequence (1,363 bp).** The splice acceptor site is shown in blue. The intronic region of the terminator is shown in italics. Three poly(A) sequences located at 320, 637, and 834 bp, respectively, from the start of the terminator sequence, are shown in red. The first AATAAA hexamer located at 320 bp is underlined and referred as the poly(A) site in this study.



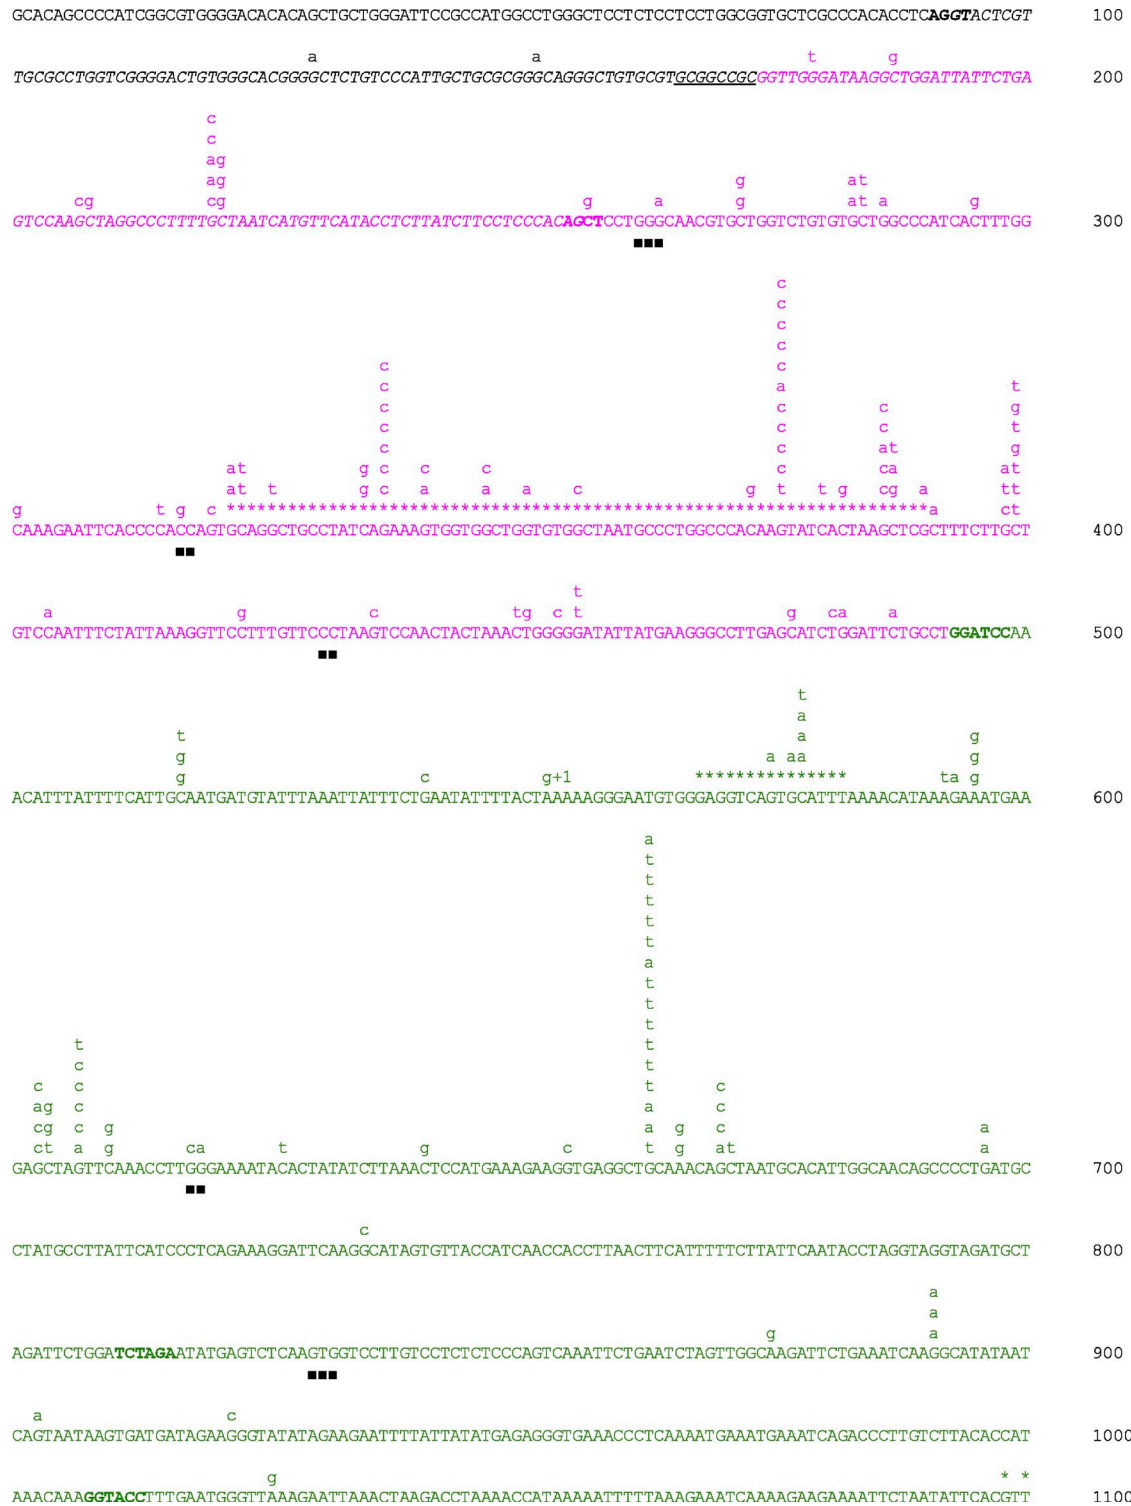

**Figure S3. Mutations in the active and inactivated terminator knock-in clones.** (+1 to +1,100 from the transcription start site), Ig gene sequence is highlighted in gray, NotI site used for cloning the  $\beta$ -globin terminator is shown by underlined nucleotides, poly(A) sequences (or mutations created to inactivate these) are marked in bold case, terminator sequence upstream of the first poly(A) site is in pink, terminator sequence downstream of poly(A) is in green, intron between IgL leader exon and terminator is shown in italics, splice donor site (AGGT) in the leader exon/intron border and acceptor site (AGCT) in the terminator region are shown in bold case, deletion mutations are indicated by \*, and insertions are indicated by + followed by number of bp inserted. ssDNA patches in the terminator regions and location of C or G converted in the bisulfite analysis are shown as black bars

**Table S1.** Primers used in this study

| Primer             | Direction | Location <sup>a</sup> | Sequence (5' to 3') <sup>b</sup>                  |
|--------------------|-----------|-----------------------|---------------------------------------------------|
| pk03               | Rev       | 165                   | gcagcgccgcACGCACAGCCCTGCCCGCGCAGCAGTGGGA          |
| pk07               | For       | 166                   | gcatcgccgcGGTTGGGATAAGGCTGGATTATTCTG              |
| pk10               | Rev       | 947                   | gcatgacgtcCGGCTGCAACGTGAATATTAGAATTTTC            |
| pk12               | For       | 1,762                 | gcatatcgatGTGCAGGCAGCGCTGACTCAGCCGTCCTCGGTGTCAGCA |
| pk22               | Rev       | 541                   | gaataaggCATATGCATCAGGGGCTGTTGCCAATGTGC            |
| pk24               | Rev       | 2,081                 | CTAGGACGGTCAGGGTTGTCCCGGCCCAAATATA                |
| pk31               | For       | 494                   | gcatggatccAAACATTTATTTTCATTGCAATGATG              |
| pk33               | Rev       | 810                   | gcattctagaTCCAGAATCTAGCATCTACCTACCTA              |
| pk48               | For       | 1,379                 | AAGCTTGCATGCCTGCAGGTCGACTCTAGA                    |
| pk50               | Rev       | 1,688                 | gcatcgccgcGAATTCTGGTAGCACCTGGTCTGCAGTGTA          |
| pk64               | For       | -48                   | GGGCGTGTGCGGAAGGACGCGGTATAAA                      |
| pk85               | Rev       | 36                    | GGAACAAAGGAACCTTTAATAGAAATGGACAGC                 |
| pk87 <sup>c</sup>  | For       | 269                   | GGGATCCGCCATGGCCTGGGCTCCTCTCC                     |
| pk93               | For       | 948                   | gcagcatgcTTTTTGAATTTGATATGAGAAGCAAAGGC            |
| pk94               | Rev       | 1,378                 | gcagcatgcTGATTCTCCACCCCAACCCCTGG                  |
| pk95               | For       | -48                   | ccaaagcttGGGCGTGTGCGGAAGGACGCGGG                  |
| pk96               | Rev       | 165                   | cctgatcatatgACGCACAGCCCTGCCCGCGCAGCA              |
| pk99               | For       | 166                   | ccaaagcttGTTGGGATAAGGCTGGATTATTCTG                |
| pk100              | Rev       | 493                   | cctgatcatatgAGGCAGAATCCAGATGCTCAAGGCC             |
| pk103 <sup>c</sup> | For       | 494                   | ccaaagcttAAACATTTATTTTCATTGCAATGATG               |
| pk104              | Rev       | 810                   | cctgatcatatgTCCAGAATCTAGCATCTACCTACCTA            |
| pk107 <sup>c</sup> | For       | 811                   | ccaaagcttATATGAGTCTCAAGTGGTCTTGTC                 |
| pk108              | Rev       | 1,107                 | cctgatcatatgCGGCTGCAACGTGAATATTAGAATTTTC          |
| pk111              | Rev       | 1,571                 | cctgatcatatgGCATGCCTGCAGGTCGACTCTAGA              |
| pk112              | For       | 1,878                 | ccaaagcttCGGTGTGAAATACCGCACAGATGCGT               |
| pk113              | For       | 1,967                 | ccaaagcttGTGCAGGCAGCGCTGACTCAGCCGTCCTCG           |
| pk114              | Rev       | 2,285                 | cctgatcatatgCTAGGACGGTCAGGGTTGTCCCGGCCCAAATATA    |
| pk117              | For       | 4,023                 | ccaaagcttGCCTCTCTTGCAGGCCAGCCCAA                  |
| pk118              | Rev       | 4,336                 | cctgatcatatgAGGGTCTCGTGATAGAGGTGCCGTTG            |
| pk154              | For       | 270                   | GCTGTCCAATTCTATTAAGGTTCTTTGTCCC                   |
| pk155              | For       | 542                   | GCACATTGGCAACAGCCCTGATGCATATGCCTTATTC             |
| pk174 <sup>c</sup> | For       | 4,178                 | CTCCACCCGCTCTGGCGAGACCA                           |
| pk182 <sup>c</sup> | Rev       | 493                   | TTTTTTTTTTTTTTTTTTTATTAGGCAGAATCCAG               |
| pk183 <sup>c</sup> | Rev       | 810                   | TTTTTTTTTTTTTTTTTTTATTCCAGAATCTAGCATC             |
| pk184 <sup>c</sup> | Rev       | 1,007                 | TTTTTTTTTTTTTTTTTTTATTTTGTATGGTGAAG               |
| pk185 <sup>c</sup> | Rev       | 4,532                 | TTTTTTTTTTTTTTTTTTTATTAATGTGACACCTGG              |
| pk186              | For       | 174                   | GGTTGGGATAAGGCTGGATTATT                           |
| pk187              | Rev       | 572                   | ACCTCCACATCCCTTTTAA                               |
| pk188              | For       | 552                   | TAAAAAGGGAATGTGGGAGGT                             |
| pk189              | Rev       | 1037                  | GTTTAATTCTTAAACCCATTGA                            |
| gg-actin1          | For       |                       | CCCCAAGCTTACTCCACAGCCAGCCATGG                     |
| gg-actin2          | Rev       |                       | GGCTCTAGATAGTCCGTCAGG                             |

<sup>a</sup>Location of primers related to transcription start site.

<sup>b</sup>Complementary region with genomic DNA is shown in capital case.

<sup>c</sup>Primers used in polyadenylated RNA assay.
